# Supplementary material for: Spatial and temporal variability of contaminants of emerging concern in a drinking water source
Source: Royal Society of Chemistry journal article supplement (doi:10.1039/d2ra02962f), 2022-01-01
Supplement: d2ra02962f1.pdf [file d2ra02962f1.pdf]

## SUPPLEMENTARY DATA

### Spatial and temporal variability of contaminants of emerging concern in a drinking water source

Rama Pulicharla<sup>1,3</sup>, Francois Proulx<sup>1</sup>, Sonja Behmel<sup>2</sup>, Jean-B. Sérodes<sup>1,4</sup> and Manuel J. Rodriguez<sup>1,\*</sup>

<sup>1</sup> École supérieure d'aménagement du territoire et de développement régional, Pavillon Félix-Antoine-Savard, bureau 1616, 2325, rue des Bibliothèques, Université Laval, Québec (QC) G1V 0A6, Canada, [rama.pulicharla.1@ulaval.ca](mailto:rama.pulicharla.1@ulaval.ca) (R.P.); [Francois.Proulx@esad.ulaval.ca](mailto:Francois.Proulx@esad.ulaval.ca) (F.P.)

<sup>2</sup> AGIRO, 433 Delage, Québec (QC) G3G 1H4, Canada, [sonja.behmel@apel-maraisdunord.org](mailto:sonja.behmel@apel-maraisdunord.org)

<sup>3</sup> Department of Civil Engineering, Lassonde School of Engineering, York University, North York, Toronto, Ontario, M3J 1P3, Canada, [ramapuli@yorku.ca](mailto:ramapuli@yorku.ca)

<sup>4</sup> Département de Génie civil et génie des eaux, Pavillon Pouliot, Université Laval, G1V 0A6 Québec (QC) G1V 0A6, Canada, [jean-baptiste.serodes.1@ulaval.ca](mailto:jean-baptiste.serodes.1@ulaval.ca)

\* Corresponding author: Email: [manuel.rodriguez@esad.ulaval.ca](mailto:manuel.rodriguez@esad.ulaval.ca), Tel. (418) 656-2131 p. 408933

**Table S1: Physicochemical properties of selected contaminants of emerging interest**

| Contaminant      | Classification                                                                                | LogP  | pKa   | solubility (mg/L) |
|------------------|-----------------------------------------------------------------------------------------------|-------|-------|-------------------|
| Acetaminophen    | Analgesics and antipyretics                                                                   | 0.91  | -4.4  | 4150              |
| Caffeine         | Central nervous system stimulant                                                              | -0.07 | 10.4  | 21600             |
| Carbamazepine    | Anti-convulsant                                                                               | 2.45  | 15.96 | 17.7              |
| Drospirenone     | Hormone                                                                                       | 3.37  | -5    | 1.81              |
| Ibuprofen        | Nonsteroidal anti-inflammatory                                                                | 3.97  | 5.3   | 21                |
| Salicylic acid   | Keratolytic agents, Metabolite of acetylsalicylic acid (analgesic), a natural plant substance | 2.26  | 2.97  | 2240              |
| Sulfamethoxazole | Antibiotic                                                                                    | 0.89  | 6.16  | 610               |

- Exut Traite Stoneham
- Riv Hurons Exu Lac StC
- Centre Lac St C nord
- Centre Lac St C sud
- Aval Barrage Lac StC
- Riv Jaune
- Riv Nelson
- Riv St Cha Barrage Prise eau

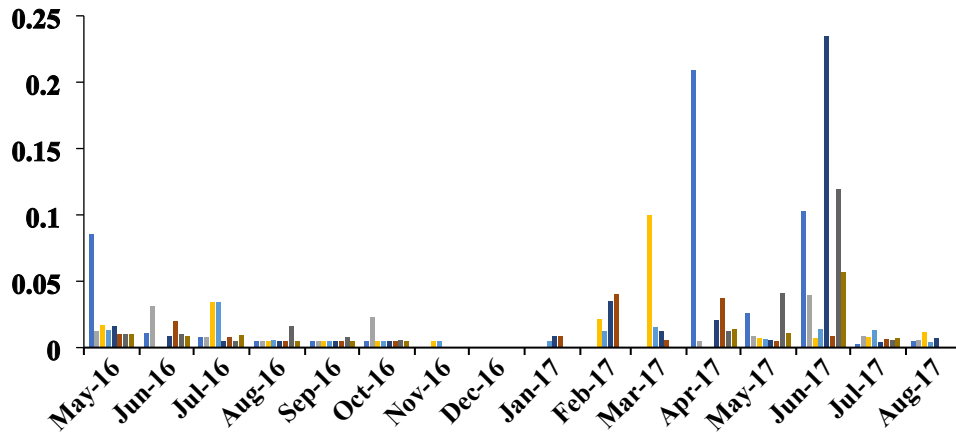

Acetaminophen

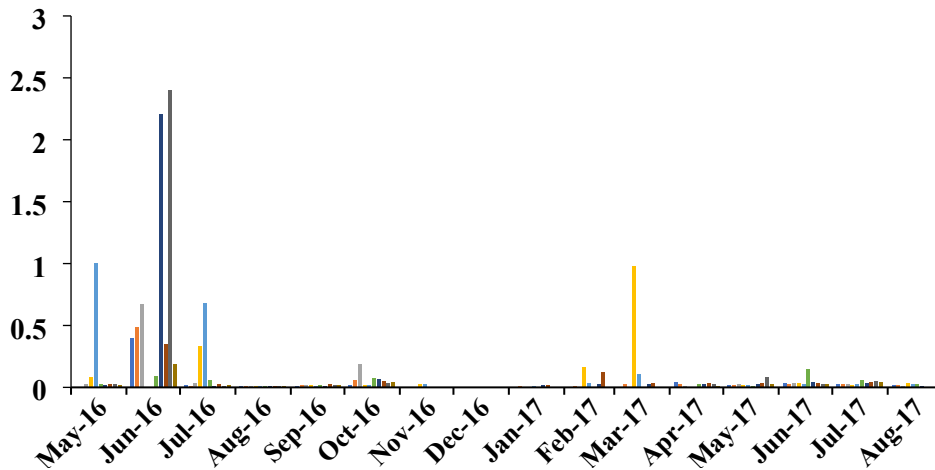

Salicylic acid

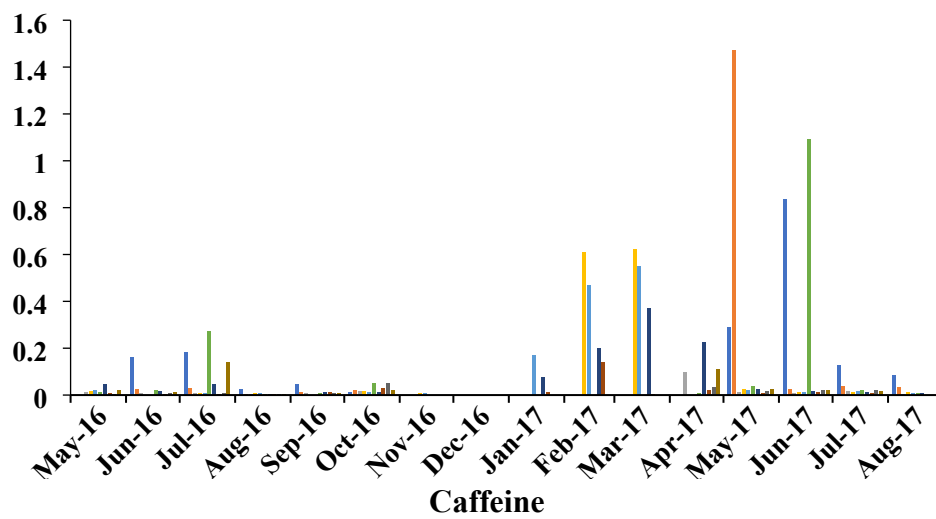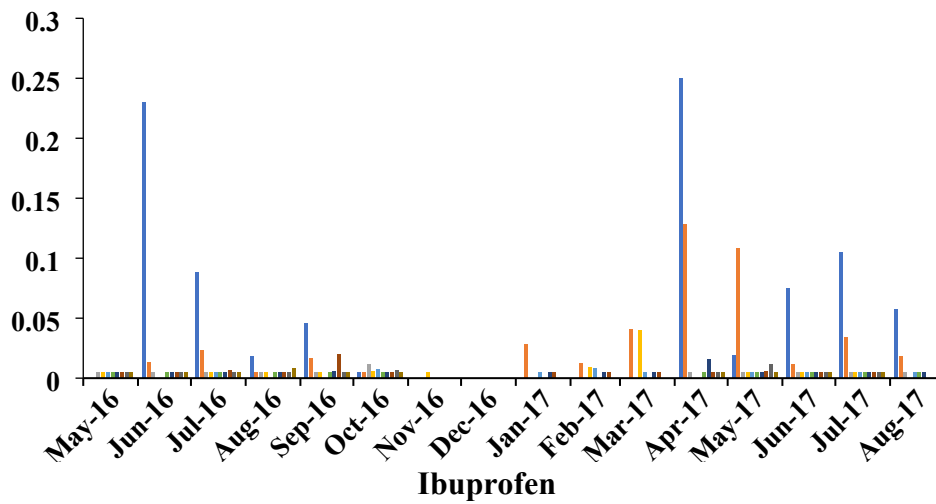

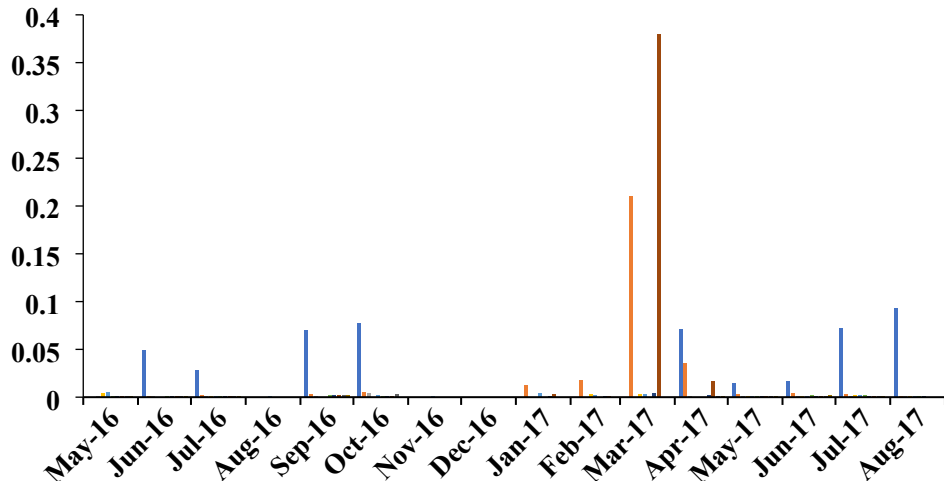

**Figure S1: Temporal variations of the selected contaminants of emerging concern Sulfamethoxazole**
